# Supplementary material for: Association between obstructive sleep apnea and venous thromboembolism recurrence: results from a French cohort
Source: PubMed Central journal article supplement (PMC8725561; doi:10.1186/s12959-021-00358-8), 2022-01-04
Supplement: 12959_2021_358_MOESM2_ESM.pdf [file 12959_2021_358_MOESM2_ESM.pdf]

**eTable 2. Risk factors associated with mortality**

| Variables                             |         | Univariable analysis<br>HR, 95% CI | p-value | Multivariable analysis<br>HR, 95% CI | p-value |
|---------------------------------------|---------|------------------------------------|---------|--------------------------------------|---------|
| Age (years)                           |         | 1.094 (1.078-1.110)                | <0.001  |                                      |         |
| Age range (years)                     |         |                                    |         |                                      |         |
|                                       | ≤50     | Ref.                               |         | Ref.                                 |         |
|                                       | ]50-65] | 6.9 (2.8-17.1)                     | <0.001  | 4.5 (1.8-11.8)                       | 0.002   |
|                                       | > 65    | 27.3 (12.0-61.9)                   | <0.001  | 14.1 (6.0-33.4)                      | <0.001  |
| BMI                                   |         | 1.0 (0.9-0.99)                     | 0.015   |                                      |         |
| BMI range (kg/m <sup>2</sup> )        |         |                                    |         |                                      |         |
|                                       | ≤25     | Ref.                               |         | Ref.                                 |         |
|                                       | ]25-30] | 0.9 (0.6-1.3)                      | 0.49    | 0.8 (0.5-1.1)                        | 0.16    |
|                                       | ]30-35] | 0.7 (0.4-1.2)                      | 0.16    | 0.6 (0.3-1.1)                        | 0.08    |
|                                       | > 35    | 0.4 (0.2-1.1)                      | 0.08    | 0.8 (0.3-2.4)                        | 0.75    |
| Females                               |         | 0.8 (0.6-1.1)                      | 0.20    | 1.0 (0.7-1.4)                        | 0.78    |
| Smoking                               |         | 1.2 (0.9-1.7)                      | 0.21    |                                      |         |
| Cerebral ischemic attack              |         | 3.1 (1.7-5.4)                      | <0.001  | 1.7 (0.9-3.4)                        | 0.12    |
| Arteriopathy                          |         | 4.6 (2.7-8.0)                      | <0.001  | 2.1 (1.1-4.2)                        | 0.025   |
| Atrial fibrillation                   |         | 8.6 (5.5-13.5)                     | <0.001  | 1.5 (0.8-2.6)                        | 0.19    |
| Transient cerebral ischemic attack    |         | 2.1 (0.7-6.7)                      | 0.20    |                                      |         |
| Familial History of VTE               |         | 0.3 (0.2-0.6)                      | <0.001  | 0.6 (0.3-0.9)                        | 0.028   |
| Statins                               |         | 0.5 (0.3-1.1)                      | 0.10    | 0.2 (0.1-0.5)                        | <0.001  |
| Antiplatelet agents                   |         | 3.1 (2.1-4.6)                      | <0.001  | 1.1 (0.7-1.9)                        | 0.67    |
| Restrictive ventilation disorder      |         | 4.0 (1.6-9.8)                      | 0.002   | 3.6 (1.3-9.6)                        | 0.012   |
| Bronchiectasis                        |         | 0.7 (0.1-4.6)                      | 0.66    |                                      |         |
| Asthma                                |         | 1.7 (0.4-6.9)                      | 0.45    |                                      |         |
| COPD                                  |         | 3.3 (2.1-5.1)                      | <0.001  | 1.4 (0.9-2.4)                        | 0.17    |
| Acute cardiac failure history         |         | 11.0 (6.6-18.3)                    | <0.001  | 3.9 (2.1-7.4)                        | <0.001  |
| Chronic cardiac failure history       |         | 5.0 (3.4-7.3)                      | <0.001  | 1.8 (1.1-3.0)                        | 0.025   |
| Cancer                                |         | 5.4 (3.6-8.0)                      | <0.001  | 5.7 (3.1-10.5)                       | <0.001  |
| Unprovoked VTE                        |         | 1.6 (1.2-2.3)                      | 0.004   | 1.8 (1.1-3.0)                        | 0.024   |
| OSA history                           |         | 0.8 (0.2-3.0)                      | 0.69    | 0.2 (0.0-1.3)                        | 0.90    |
| OSA occurrence                        |         | 0.0 (0.0-Inf)                      | 0.99    | 0.0 (0.0-Inf)                        | 0.99    |
| Anticoagulation duration range (days) |         |                                    |         |                                      |         |
|                                       | 90-180  | 0.4 (0.2-0.6)                      | <0.001  | 0.6 (0.3-0.9)                        | 0.028   |
|                                       | 180-360 | 0.4 (0.3-0.6)                      | <0.001  | 0.5 (0.3-0.8)                        | 0.002   |
|                                       | > 360   | 0.4 (0.3-0.7)                      | 0.002   | 0.5 (0.3-0.8)                        | 0.01    |
| Anticoagulation duration              |         | 1.0 (1.0-1.0)                      | 0.40    |                                      |         |

BMI, body mass index; OSA, Obstructive Sleep Apnea; VTE, Venous Thromboembolism; COPD, chronic obstructive pulmonary disease
